# Supplementary material
Source: PubMed Central journal article supplement (PMC7116185)
Supplement: EMS96043-supplement-Supplementary_Figure_1.pdf [file EMS96043-supplement-Supplementary_Figure_1.pdf]

### Gating Strategy: Representative Images from *PolgA*<sup>+/+</sup> mice

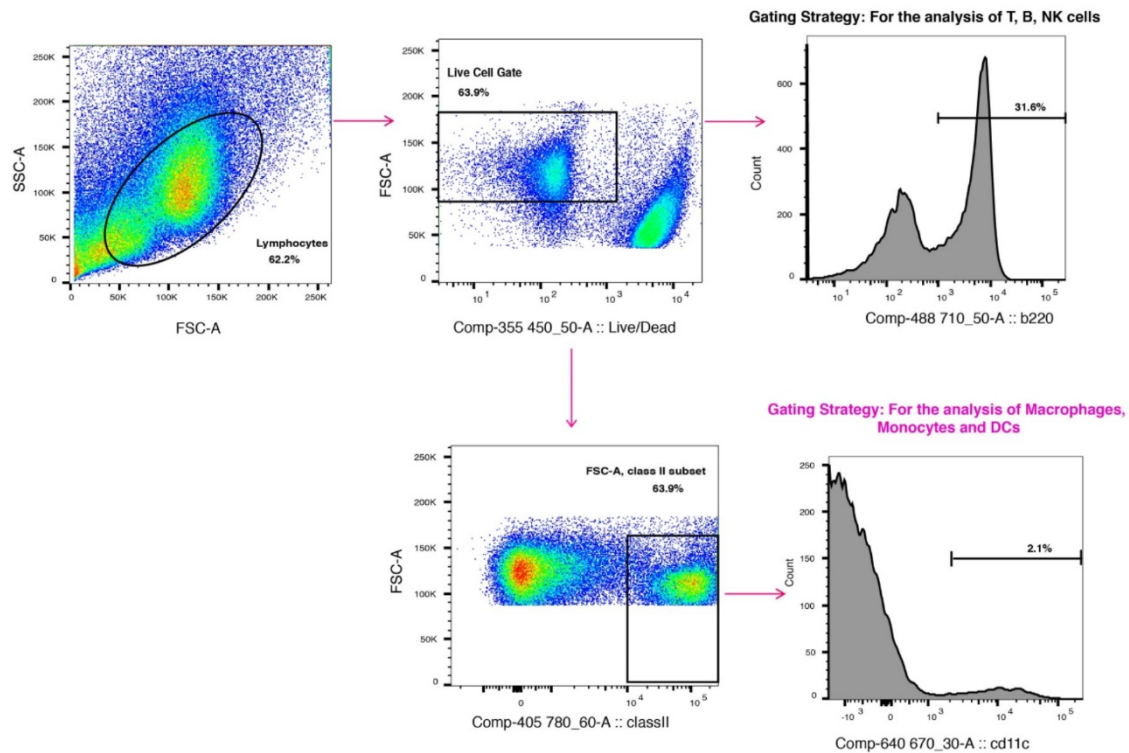

**Supplementary Information Figure 1: Gating Strategy.** Single cell suspensions were generated from small intestine after removing the Peyer's patches. Cells were stained with antibodies and then analysed by flow cytometry using the Flowjo v10 software. The gating strategy is as follows: Lymphocyte gate was first applied to gate out debris. From this gate, a second gate was derived to exclude dead cells using the LIVE/DEAD marker. From this gate, the frequency of T (CD4, CD8), B cells (B220) and NK cells was analysed as shown in the top panel of the figure. In order to determine the frequency of myeloid cells such as macrophages, monocytes and dendritic cells, the following gating strategy was used. From the LIVE/DEAD gate, the frequency of class II positive cells was determined. A gate was drawn on class II positive cells and from this gate the frequency of DCs (CD11c), monocytes (CD11b) and macrophages (F4/80) was determined as shown in the bottom panel.
